# Supplementary material for: Electrochemical Impedance Spectroscopy for the Sensing of the Kinetic Parameters of Engineered Enzymes
Source: MDPI journal article supplement (doi:10.3390/s24082643), 2024-04-20
Supplement: s1 [file s1]

# Electrochemical impedance spectroscopy for the sensing of the kinetic parameters of engineered enzymes

Adriána Dusíková<sup>1</sup>, Timea Baranová<sup>2</sup>, Ján Krahulec<sup>1</sup>, Olívia Dakošová<sup>2</sup>, Ján Híveš<sup>2</sup>, Monika Naumowicz<sup>3</sup>, and Miroslav Gál<sup>2,\*</sup>

<sup>1</sup> Dept. of Molecular Biology, Faculty of Natural Sciences, Comenius University, Ilkovičova 6, 842 15 Bratislava, Slovakia

<sup>2</sup> Dept. of Inorganic Technology, Faculty of Chemical and Food Technology STU in Bratislava, Radlinského 9, 812 37 Bratislava, Slovakia

<sup>3</sup> Faculty of Chemistry, University of Białystok, ul. K. Ciołkowskiego 1K, 15-245 Białystok, Poland

\* Correspondence: miroslav.gal@stuba.sk; (M.G.)

## S1: The list of primers for side-specific mutagenesis.

XhoI hEKL F – GGGGCTCGAGAAAAGAGAGGCTGAAGCTATTGTTGGAG

NotI hEKL R - GGGGGCGGCCGCTAATGATGGTGATGGTGGTGCAAGA

Mut hEKL K99R F – CCTCATTATAACAGAAGAAGAAGAGATAATGATATTGCTATG

Mut hEKL K99R R – CATAGCAATATCATTATCTCTTCTTCTTCTGTTATAATGAGG

Mut hEKL N101S F –  
CATTATAACAGAAGAAGAAAAGATAGTGATATTGCTATGATGCATTTGG

Mut hEKL N101S R –  
CCAAATGCATCATAGCAATATCACTATCTTTTCTTCTTCTGTTATAATG

Mut hEKL N95E F - GTTATTAACCCTCATTATGAGAGAAGAAGAAAAGATAATG

Mut hEKL N95E R - CATTATCTTTTCTTCTTCTCATAATGAGGGTTAATAAC

Mut hEKL N95D F - GTTATTAACCCTCATTATGACAGAAGAAGAAAAGATAATG

Mut hEKL N95D R - CATTATCTTTTCTTCTTCTGTCATAATGAGGGTTAATAAC

Mut hEKL D100N F – CATTATAACAGAAGAAGAAAAAATAATGATATTGCTATGATGC

Mut hEKL D100N R - GCATCATAGCAATATCATTATTTTTCTTCTTCTGTTATAATG
